# Supplementary material
Source: PubMed Central journal article supplement (PMC5520425)
Supplement: IAI.00017-17_zii999092091s1.pdf [file IAI.00017-17_zii999092091s1.pdf]

## Supplemental Material

**Table S1.** Genes upregulated by CHP stress.

| Open reading frame <sup>a</sup>          | Gene         | Predicted function                                                   | Fold-change (CHP/control) |
|------------------------------------------|--------------|----------------------------------------------------------------------|---------------------------|
| <b>Antioxidant enzymes</b>               |              |                                                                      |                           |
| CV_0209                                  | <i>ohrA</i>  | organic hydroperoxide resistance protein                             | 61.45                     |
| CV_0300                                  |              | probable cytochrome-c peroxidase                                     | 3.19                      |
| CV_1107                                  | <i>gpx</i>   | glutathione peroxidase                                               | 9.18                      |
| CV_2036                                  | <i>garA</i>  | probable peroxiredoxin/glutaredoxin family protein                   | 75.25                     |
| CV_2504                                  | <i>sodB1</i> | superoxide dismutase, Fe-Mn family                                   | 2.40                      |
| CV_2815                                  | <i>bcp</i>   | bacterioferritin comigratory protein; peroxiredoxin Q/BCP            | 2.00                      |
| CV_3549                                  | <i>katE</i>  | catalase                                                             | 72.90                     |
| <b>Reducing systems</b>                  |              |                                                                      |                           |
| CV_1106                                  | <i>trxC</i>  | thioredoxin 2                                                        | 19.54                     |
| CV_1164                                  | <i>gst1</i>  | glutathione S-transferase family protein                             | 2.26                      |
| CV_2037                                  | <i>garB</i>  | probable dihydrolipoamide dehydrogenase                              | 85.30                     |
| CV_2424                                  | <i>gstA</i>  | glutathione S-transferase                                            | 7.79                      |
| CV_2813                                  | <i>trxB</i>  | thioredoxin reductase (NADPH)                                        | 3.26                      |
| CV_4275                                  | <i>gshB</i>  | glutathione synthetase protein                                       | 2.43                      |
| CV_4276                                  | <i>gshA</i>  | glutamate-cysteine ligase                                            | 2.72                      |
| <b>Glyoxalases/Oxidoreductases</b>       |              |                                                                      |                           |
| CV_0197                                  |              | hypothetical protein (Glyoxalase//Dioxygenase superfamily)           | 3.85                      |
| CV_0969                                  | <i>hpd</i>   | 4-hydroxyphenylpyruvate dioxygenase                                  | 3.14                      |
| CV_1319                                  |              | conserved hypothetical protein (Glyoxalase//Dioxygenase superfamily) | 3.52                      |
| CV_2043                                  |              | probable quinone oxidoreductase; NADPH2:quinone reductase            | 4.23                      |
| CV_2341                                  |              | conserved hypothetical protein (Glyoxalase//Dioxygenase superfamily) | 4.47                      |
| CV_2565                                  |              | probable oxidoreductase                                              | 7.63                      |
| CV_3486                                  |              | conserved hypothetical protein (Glyoxalase/Dioxygenase superfamily)  | 11.84                     |
| CV_3500                                  | <i>nfsA</i>  | oxygen-insensitive NADPH nitroreductase; FMN reductase [NAD(P)H]     | 15.66                     |
| CV_3501                                  | <i>nemA1</i> | NADH-dependent oxidoreductase; N-ethylmaleimide reductase            | 21.25                     |
| <b>Degradation of aromatic compounds</b> |              |                                                                      |                           |
| CV_0993                                  | <i>pcaK</i>  | MFS transporter, AAHS family, 4-hydroxybenzoate transporter          | 2.58                      |
| CV_3287                                  |              | probable tautomerase                                                 | 5.44                      |
| CV_3288                                  | <i>pcaC</i>  | 4-carboxymuconolactone decarboxylase                                 | 7.63                      |
| CV_3550                                  |              | conserved hypothetical protein (aromatic ring-opening dioxygenase)   | 15.36                     |
| <b>DNA damage/repair</b>                 |              |                                                                      |                           |
| CV_0578                                  |              | guanine deaminase                                                    | 2.54                      |
| CV_1363                                  |              | trans-acting regulatory HvrA protein; DNA-binding protein H-NS       | 3.12                      |
| CV_2111                                  |              | probable methyltransferase; DNA adenine methylase                    | 3.56                      |
| CV_2332                                  | <i>umuD</i>  | SOS mutagenesis; DNA polymerase V                                    | 4.10                      |
| CV_2814                                  |              | conserved hypothetical protein (Smr domain)                          | 2.59                      |
| CV_3229                                  |              | deoxyribodipyrimidine photolyase-related protein                     | 2.26                      |
| CV_3481                                  | <i>phrB</i>  | deoxyribodipyrimidine photo-lyase                                    | 4.79                      |
| CV_4253                                  | <i>dps</i>   | DNA-binding stress protein; starvation-inducible DNA-binding protein | 4.45                      |
| <b>Heat shock response (sigma RpoH)</b>  |              |                                                                      |                           |
| CV_0401                                  | <i>hslV</i>  | heat shock protein; ATP-dependent HslUV protease                     | 7.26                      |
| CV_0402                                  | <i>hslU</i>  | heat shock protein hslU; ATP-dependent HslUV protease                | 6.34                      |
| CV_1177                                  |              | probable small heat shock protein; HSP20 family protein              | 8.86                      |
| CV_1318                                  | <i>hptG</i>  | probable chaperone heat shock protein hptG                           | 3.27                      |
| CV_1642                                  | <i>grpE</i>  | heat shock protein GrpE                                              | 5.43                      |
| CV_1643                                  | <i>dnaK</i>  | heat shock protein DnaK; chaperone protein                           | 4.07                      |
| CV_1944                                  | <i>clpB</i>  | ATP-dependent Clp protease subunit; heat-shock protein               | 23.09                     |
| CV_2555                                  | <i>lon</i>   | endopeptidase La; ATP-dependent Lon protease                         | 4.98                      |
| CV_3232                                  | <i>groES</i> | GroES; chaperonin 10kD subunit                                       | 3.93                      |

|                                                    |               |                                                                        |       |
|----------------------------------------------------|---------------|------------------------------------------------------------------------|-------|
| CV_3233                                            | <i>groEL</i>  | chaperonin 60kD subunit                                                | 2.25  |
| CV_3668                                            |               | ATP-dependent Clp protease adaptor protein ClpS                        | 8.87  |
| CV_3669                                            | <i>clpA</i>   | ATP-dependent Clp protease, ATP-binding subunit                        | 7.00  |
| CV_4014                                            | <i>groEL1</i> | chaperonin 60kD subunit                                                | 5.46  |
| CV_4015                                            | <i>groES1</i> | chaperonin 10kD subunit                                                | 4.96  |
| CV_4206                                            | <i>rpoH</i>   | RNA polymerase sigma-32 factor                                         | 3.23  |
| <b>Iron uptake systems (Fur regulon)</b>           |               |                                                                        |       |
| CV_0077                                            |               | probable TonB-dependent receptor                                       | 3.00  |
| CV_0398                                            | <i>exbD2</i>  | biopolymer transport exbD transmembrane protein                        | 11.23 |
| CV_0399                                            |               | probable exbB-like biopolymer transport                                | 13.78 |
| CV_0400                                            |               | periplasmic protein TonB                                               | 8.60  |
| CV_0793                                            |               | probable nitrogen fixation protein VnfA                                | 2.11  |
| CV_0794                                            |               | probable high-affinity iron permease                                   | 2.69  |
| CV_0795                                            |               | hypothetical protein (Cupredoxin-like domain)                          | 3.24  |
| CV_0796                                            |               | periplasmic iron binding protein                                       | 7.96  |
| CV_1481                                            | <i>aroF</i>   | 2-dehydro-3-deoxy-phosphoheptonate aldolase                            | 40.54 |
| CV_1482                                            | <i>entA</i>   | 2,3-dihydro-2,3-dihydroxybenzoate dehydrogenase                        | 60.68 |
| CV_1483                                            | <i>entB</i>   | bifunctional isochorismate lyase/aryl carrier protein                  | 56.75 |
| CV_1484                                            | <i>entE</i>   | 2,3-dihydroxybenzoate-AMP ligase                                       | 44.76 |
| CV_1485                                            | <i>entC</i>   | isochorismate synthase EntC / MenF                                     | 26.54 |
| CV_1486                                            | <i>entF</i>   | enterobactin synthetase component F                                    | 41.81 |
| CV_1487                                            |               | probable iron transport system ATP-binding protein                     | 9.68  |
| CV_1488                                            | <i>ecD</i>    | ferric citrate transport system permease protein                       | 9.18  |
| CV_1489                                            |               | probable periplasmic substrate-binding transport protein               | 9.54  |
| CV_1490                                            |               | conserved hypothetical protein                                         | 9.03  |
| CV_1491                                            |               | outer membrane receptor for ferrienterochelin and colicins             | 21.04 |
| CV_1971                                            |               | conserved hypothetical protein                                         | 2.04  |
| CV_1972                                            | <i>exbB1</i>  | biopolymer transport protein                                           | 2.77  |
| CV_1973                                            | <i>exbD5</i>  | biopolymer transport exbD transmembrane protein                        | 2.60  |
| CV_1974                                            | <i>exbD3</i>  | biopolymer transport exbD transmembrane protein                        | 2.64  |
| CV_1982                                            |               | probable tonB dependent receptor                                       | 5.35  |
| CV_1983                                            |               | periplasmic protein TonB                                               | 2.48  |
| CV_1986                                            | <i>exbD4</i>  | biopolymer transport exbD transmembrane protein                        | 2.49  |
| CV_2230                                            | <i>fepA</i>   | enterobactin-iron outermembrane receptor protein                       | 21.68 |
| CV_2231                                            | <i>fes</i>    | enterochelin esterase                                                  | 18.86 |
| CV_2232                                            |               | probable MbtH-like protein                                             | 46.87 |
| CV_2233                                            | <i>cbsF</i>   | synthetase CbsF                                                        | 4.57  |
| CV_2234                                            | <i>fepC</i>   | enterobactin-iron transport system ATP-binding protein                 | 11.10 |
| CV_2235                                            | <i>fepG</i>   | enterobactin-iron transport system permease protein                    | 10.78 |
| CV_2236                                            | <i>fepD</i>   | enterobactin-iron transport system permease protein                    | 4.16  |
| CV_2237                                            |               | MFS transporter, ENTS family, enterobactin (siderophore) exporter      | 9.70  |
| CV_2239                                            | <i>fepB</i>   | ferrienterobactin-binding periplasmic protein precursor                | 20.84 |
| CV_2251                                            | <i>thiA</i>   | ferrichrome-iron outermembrane receptor protein                        | 17.79 |
| CV_2387                                            | <i>ribE</i>   | riboflavin synthase, alpha chain                                       | 5.41  |
| CV_2388                                            |               | conserved hypothetical protein                                         | 4.58  |
| CV_2389                                            | <i>ribAB</i>  | riboflavin biosynthesis bifunctional protein                           | 3.62  |
| CV_3895                                            |               | hypothetical protein (Hemin uptake protein hemP)                       | 22.72 |
| CV_3896                                            |               | TonB-dependent receptor; hemoglobin/transferrin/lactoferrin receptor   | 35.35 |
| CV_3897                                            |               | probable hemin degrading factor                                        | 36.73 |
| CV_3898                                            |               | probable permease of ABC transporter; iron complex transport system    | 15.55 |
| CV_3899                                            | <i>fecE</i>   | ferric citrate transport system ATP-binding protein                    | 7.76  |
| CV_4254                                            |               | periplasmic protein TonB                                               | 2.81  |
| <b>Nitrogen starvation response (NtrC regulon)</b> |               |                                                                        |       |
| CV_0118                                            | <i>gltK</i>   | glutamate/aspartate transport system permease protein                  | 2.47  |
| CV_3589                                            | <i>glnA</i>   | glutamine synthetase                                                   | 6.57  |
| CV_3591                                            | <i>ntrB</i>   | two-component sensor NtrB; nitrogen regulation histidine kinase GlnL   | 2.73  |
| CV_3592                                            | <i>glnG</i>   | NtrC family, nitrogen regulation response regulator GlnG               | 3.27  |
| CV_4002                                            | <i>glnK</i>   | nitrogen regulatory protein P-II-2; nitrogen regulatory protein P-II 2 | 39.44 |

|                                                             |              |                                                                           |       |
|-------------------------------------------------------------|--------------|---------------------------------------------------------------------------|-------|
| CV_4003                                                     | <i>amtB</i>  | ammonium transporter, Amt family                                          | 32.43 |
| CV_4038                                                     | <i>gltB</i>  | glutamate synthase (NADPH/NADH) large chain                               | 2.31  |
| <b>Efflux systems</b>                                       |              |                                                                           |       |
| CV_0921                                                     | <i>chrB</i>  | chromate resistance signal peptide protein                                | 3.90  |
| CV_0922                                                     | <i>chrA</i>  | chromate ion transporter protein                                          | 3.83  |
| CV_1154                                                     | <i>zntA</i>  | lead,cadmium,zinc and mercury exporting ATPase                            | 2.32  |
| CV_1179                                                     |              | probable multidrug resistance protein                                     | 3.87  |
| CV_1180                                                     | <i>estX</i>  | esterase/lipase                                                           | 2.80  |
| CV_1181                                                     |              | hypothetical protein                                                      | 2.91  |
| CV_2240                                                     |              | probable multidrug efflux protein; membrane fusion protein                | 18.91 |
| CV_2241                                                     | <i>acrB</i>  | acriflavin resistance protein B; multidrug efflux pump                    | 25.62 |
| CV_2242                                                     | <i>ibeB</i>  | outer membrane drug efflux lipoprotein                                    | 16.16 |
| CV_3923                                                     |              | probable transport/efflux transmembrane protein                           | 2.40  |
| CV_3924                                                     |              | probable transmembrane drug efflux protein                                | 3.15  |
| <b>Signal transduction/Regulatory function</b>              |              |                                                                           |       |
| CV_0208                                                     |              | hypothetical protein (GGDEF domain)                                       | 9.21  |
| CV_0210                                                     | <i>ohrR</i>  | MarR family transcriptional regulator                                     | 23.08 |
| CV_0239                                                     |              | conserved hypothetical protein (Protoglobin; GGDEF domain)                | 2.53  |
| CV_0657                                                     |              | conserved hypothetical protein (EAL domain)                               | 2.60  |
| CV_1095                                                     |              | Rrf2 family transcriptional regulator, iron-sulfur cluster assembly       | 2.44  |
| CV_1827                                                     | <i>cbl</i>   | LysR family transcriptional regulator, cys transcriptional activator      | 2.09  |
| CV_1919                                                     |              | conserved hypothetical protein (Response regulator receiver domain)       | 3.19  |
| CV_3480                                                     |              | probable transcriptional regulator, AraC family                           | 2.80  |
| CV_3533                                                     | <i>hfq</i>   | host factor-I protein                                                     | 3.04  |
| CV_3631                                                     |              | probable transcriptional regulator AraC family                            | 2.56  |
| CV_3713                                                     |              | probable transcriptional regulator (AraC family)                          | 2.75  |
| CV_3860                                                     |              | hypothetical protein (Helix-turn-helix domain)                            | 4.60  |
| CV_3922                                                     |              | probable transcription regulator, TetR family                             | 2.22  |
| CV_4096                                                     |              | GntR family transcriptional regulator / MocR family aminotransferase      | 2.49  |
| <b>Fatty acid modification</b>                              |              |                                                                           |       |
| CV_1644                                                     | <i>desD</i>  | linoleoyl-CoA desaturase                                                  | 2.21  |
| CV_3226                                                     | <i>cfa</i>   | cyclopropane-fatty-acyl-phospholipid synthase                             | 3.19  |
| <b>Transport and metabolism of peptides and amino acids</b> |              |                                                                           |       |
| CV_0057                                                     | <i>lasB</i>  | class 4 metalloprotease; pseudolysin                                      | 2.28  |
| CV_0315                                                     |              | probable peptidase                                                        | 3.22  |
| CV_0405                                                     |              | probable amino acid ABC transporter; substrate-binding protein            | 3.38  |
| CV_0586                                                     | <i>ilvI</i>  | acetolactate synthase isozyme III, large subunit                          | 3.38  |
| CV_0587                                                     | <i>ilvH</i>  | acetolactate synthase isozyme III, small subunit                          | 3.92  |
| CV_0588                                                     | <i>ilvC</i>  | ketol-acid reductoisomerase                                               | 3.70  |
| CV_0852                                                     | <i>argT</i>  | subunit of the lysine/arginine/ornithine transporter (ABC superfamily)    | 2.21  |
| CV_0853                                                     | <i>hisQ1</i> | histidine transport system permease protein                               | 2.47  |
| CV_0854                                                     | <i>hisM1</i> | histidine transport system membrane protein M                             | 2.77  |
| CV_0876                                                     | <i>prtC</i>  | oligopeptidase A                                                          | 6.48  |
| CV_1097                                                     |              | probable binding protein component of ABC dipeptide transporter           | 3.57  |
| CV_1098                                                     | <i>dppB</i>  | dipeptide transport system permease protein                               | 2.45  |
| CV_1292                                                     | <i>ctaQ</i>  | carboxypeptidase Taq                                                      | 3.50  |
| CV_1934                                                     | <i>metY</i>  | O-acetylhomoserine (thiol)-lyase                                          | 2.08  |
| CV_1992                                                     |              | probable lysine decarboxylase                                             | 2.55  |
| CV_1994                                                     | <i>argG</i>  | argininosuccinate synthase                                                | 2.54  |
| CV_2094                                                     | <i>ilvE</i>  | branched-chain-amino-acid transaminase                                    | 2.26  |
| CV_2481                                                     |              | probable amino acid ABC transporter; substrate-binding protein            | 3.04  |
| CV_3085                                                     | <i>aotJ</i>  | arginine/ornithine transport, substrate-binding protein (ABC superfamily) | 2.21  |
| CV_3093                                                     | <i>ilvA</i>  | threonine dehydratase                                                     | 2.82  |
| CV_3180                                                     | <i>phhA</i>  | phenylalanine 4-monooxygenase                                             | 2.98  |
| CV_3506                                                     |              | probable protease precursor; peptidyl-Lys metalloendopeptidase            | 4.42  |
| CV_4329                                                     |              | probable oligopeptide ABC transporter system, substrate-binding protein   | 4.48  |
| <b>Miscellaneous</b>                                        |              |                                                                           |       |

|         |              |                                                                     |       |
|---------|--------------|---------------------------------------------------------------------|-------|
| CV_0362 |              | probable thermolabile hemolysin, lecithin dependent                 | 2.30  |
| CV_0372 |              | probable resistance protein; phosphinothricin acetyltransferase     | 3.23  |
| CV_0762 | <i>cstA2</i> | carbon starvation protein                                           | 3.55  |
| CV_0917 |              | probable C4-dicarboxylate transporter large subunit                 | 2.34  |
| CV_0918 | <i>dctQ</i>  | C4-dicarboxylate transport system, permease small subunit           | 3.08  |
| CV_0919 |              | probable C4-dicarboxylate-binding periplasmic protein               | 3.59  |
| CV_1094 | <i>nifS</i>  | pyridoxal-phosphate-dependent aminotransferase;cysteine desulfurase | 2.01  |
| CV_1167 |              | probable ABC transporter protein                                    | 2.67  |
| CV_1184 | <i>eutC</i>  | ethanolamine ammonia-lyase light chain                              | 2.00  |
| CV_1185 | <i>eutB</i>  | ethanolamine ammonia-lyase heavy chain                              | 2.82  |
| CV_1186 |              | probable ethanolamin permease                                       | 4.23  |
| CV_1299 |              | probable MFS transporter                                            | 3.21  |
| CV_1758 |              | probable acetyl-coenzyme A synthetase                               | 2.16  |
| CV_1880 | <i>cynS</i>  | cyanate lyase                                                       | 2.83  |
| CV_1881 | <i>cynT</i>  | carbonate dehydratase; carbonic anhydrase                           | 2.72  |
| CV_1920 |              | probable pirin-like protein                                         | 3.40  |
| CV_2005 | <i>ribA</i>  | GTP cyclohydrolase II                                               | 2.45  |
| CV_2054 | <i>acnA2</i> | aconitate hydratase                                                 | 2.27  |
| CV_2056 | <i>prpC</i>  | citrate synthase 2; 2-methylcitrate synthase                        | 3.30  |
| CV_2336 |              | probable ThiJ/Pfpl family protein                                   | 2.88  |
| CV_2495 | <i>fliC2</i> | flagellin                                                           | 2.94  |
| CV_2816 |              | PhoH-like ATPase                                                    | 2.56  |
| CV_3210 | <i>dgt</i>   | dGTPase                                                             | 2.92  |
| CV_3211 | <i>gpmB</i>  | phosphoglycerate mutase 2                                           | 2.50  |
| CV_3278 |              | probable cytochrome b561                                            | 2.26  |
| CV_3298 | <i>lamB</i>  | maltoporin precursor                                                | 2.34  |
| CV_3402 | <i>trmU</i>  | tRNA (5-methylaminomethyl-2-thiouridylate)-methyltransferase        | 2.41  |
| CV_3424 | <i>ompC</i>  | porin signal peptide protein                                        | 2.11  |
| CV_3511 |              | probable signal peptide protein                                     | 2.30  |
| CV_3653 | <i>ugpC</i>  | sn-glycerol-3-phosphate transport, ATP-binding protein              | 2.21  |
| CV_3654 |              | probable ABC transporter family protein                             | 2.45  |
| CV_3655 | <i>ugpA</i>  | sn-glycerol-3-phosphate transport system, permease protein          | 2.46  |
| CV_3694 |              | iron-sulfur cluster insertion protein                               | 3.13  |
| CV_3711 |              | translation initiation factor 1                                     | 2.80  |
| CV_3797 | <i>hflB</i>  | cell division protein FtsH                                          | 2.36  |
| CV_4156 |              | methyl-accepting chemotaxis protein                                 | 2.38  |
| CV_4252 |              | protein FxsA                                                        | 3.91  |
| CV_4264 | <i>fmt</i>   | methionyl-tRNA formyltransferase                                    | 2.35  |
| CV_4265 | <i>def</i>   | polypeptide deformylase                                             | 2.57  |
| CV_4281 | <i>secA</i>  | preprotein translocase secA subunit                                 | 2.73  |
| CV_4335 | <i>moaC</i>  | molybdenum cofactor biosynthesis protein C                          | 3.71  |
| CV_4337 | <i>lpxC</i>  | UDP-3-O-[3-hydroxymyristoyl] N-acetylglucosamine deacetylase        | 3.32  |
| CV_4376 | <i>bioC</i>  | biotin synthesis protein; malonyl-CoA O-methyltransferase           | 2.05  |
| CV_4377 | <i>bioH</i>  | BioH protein; pimeloyl-[acyl-carrier protein] methyl ester esterase | 2.26  |
|         |              | <b>Hypothetical/Conserved hypothetical protein</b>                  |       |
| CV_0301 |              | hypothetical protein                                                | 5.27  |
| CV_0317 |              | hypothetical protein                                                | 2.83  |
| CV_0330 |              | conserved hypothetical protein (DUF4243 domain)                     | 12.65 |
| CV_0397 |              | conserved hypothetical protein (Transglutaminase-like superfamily)  | 2.75  |
| CV_0636 |              | hypothetical protein                                                | 2.86  |
| CV_0637 |              | hypothetical protein                                                | 2.66  |
| CV_0658 |              | conserved hypothetical protein (Tim44-like domain)                  | 2.59  |
| CV_0686 |              | conserved hypothetical protein                                      | 2.77  |
| CV_0801 |              | conserved hypothetical protein (MFS domain)                         | 2.67  |
| CV_1165 |              | conserved hypothetical protein; Ala-tRNA(Pro) deacylase             | 10.99 |
| CV_1166 |              | conserved hypothetical protein                                      | 12.03 |
| CV_1210 |              | conserved hypothetical protein                                      | 2.76  |
| CV_1211 |              | hypothetical protein                                                | 2.64  |

|                                  |                                                                        |       |
|----------------------------------|------------------------------------------------------------------------|-------|
| CV_1441                          | conserved hypothetical protein                                         | 6.41  |
| CV_1617                          | conserved hypothetical protein                                         | 9.54  |
| CV_2038                          | conserved hypothetical protein (Shigella flexneri OspC protein motif)  | 4.64  |
| CV_2053                          | conserved hypothetical protein (PrpF protein motif)                    | 2.03  |
| CV_2055                          | conserved hypothetical protein (Glycolipid_bind)                       | 2.65  |
| CV_2080                          | conserved hypothetical protein                                         | 2.17  |
| CV_2250                          | conserved hypothetical protein (PepSY-associated TM helix motif)       | 15.45 |
| CV_2331                          | hypothetical protein                                                   | 4.21  |
| CV_2486                          | conserved hypothetical protein                                         | 2.28  |
| CV_2563                          | hypothetical protein                                                   | 3.86  |
| CV_2564                          | hypothetical protein                                                   | 2.90  |
| CV_2695                          | hypothetical protein                                                   | 3.46  |
| CV_2696                          | conserved hypothetical protein (Putative modulator of DNA gyrase)      | 2.20  |
| CV_2861                          | conserved hypothetical protein (SnoaL-like domain)                     | 14.23 |
| CV_2900                          | hypothetical protein                                                   | 2.71  |
| CV_2902                          | conserved hypothetical protein                                         | 15.18 |
| CV_2970                          | conserved hypothetical protein                                         | 23.97 |
| CV_3225                          | conserved hypothetical protein                                         | 2.62  |
| CV_3228                          | conserved hypothetical protein (SnoaL-like domain)                     | 2.26  |
| CV_3276                          | conserved hypothetical protein (YceI-like domain)                      | 2.44  |
| CV_3277                          | conserved hypothetical protein                                         | 2.61  |
| CV_3580                          | conserved hypothetical protein                                         | 2.26  |
| CV_3632                          | hypothetical protein                                                   | 7.64  |
| CV_3634                          | conserved hypothetical protein                                         | 2.73  |
| CV_3712                          | hypothetical protein                                                   | 2.58  |
| CV_3714                          | conserved hypothetical protein (SnoaL-like domain)                     | 2.30  |
| CV_3861                          | conserved hypothetical protein                                         | 6.40  |
| CV_3862                          | conserved hypothetical protein                                         | 16.20 |
| CV_3962                          | hypothetical protein                                                   | 4.99  |
| CV_4106                          | hypothetical protein                                                   | 2.50  |
| CV_4107                          | conserved hypothetical protein                                         | 3.22  |
| CV_4308                          | conserved hypothetical protein (extracellular solute-binding proteins) | 2.33  |
| CV_4336                          | hypothetical protein                                                   | 3.39  |
| VBIBhrVio67196_0754 <sup>b</sup> | Hypothetical small protein yjiX                                        | 3.43  |
| VBIBhrVio67196_1151 <sup>b</sup> | hypothetical protein                                                   | 2.62  |
| VBIBhrVio67196_1164 <sup>b</sup> | hypothetical protein                                                   | 3.36  |
| VBIChrVio67196_1450 <sup>b</sup> | hypothetical protein                                                   | 16.49 |
| VBIChrVio67196_1608 <sup>b</sup> | hypothetical protein                                                   | 2.05  |
| VBIChrVio67196_1918 <sup>b</sup> | hypothetical protein                                                   | 2.75  |
| VBIChrVio67196_1943 <sup>b</sup> | hypothetical protein                                                   | 2.28  |
| VBIChrVio67196_3145 <sup>b</sup> | Putative lipoprotein precursor                                         | 2.63  |
| VBIChrVio67196_3148 <sup>b</sup> | hypothetical protein                                                   | 2.18  |
| VBIChrVio67196_3323 <sup>b</sup> | Bacterioferritin-associated ferredoxin                                 | 5.03  |
| VBIChrVio67196_3428 <sup>b</sup> | hypothetical protein                                                   | 69.44 |
| VBIChrVio67196_3790 <sup>b</sup> | hypothetical protein                                                   | 11.59 |
| VBIChrVio67196_3826 <sup>b</sup> | Periplasmic hemin-binding protein                                      | 10.80 |

<sup>a</sup>ORF nomenclature as described from the former *C. violaceum* genome annotation.

<sup>b</sup>New ORFs annotated by PATRIC (Pathosystems Integration Resource Center).

Table S2. Genes downregulated by CHP stress.

| Open reading frame <sup>a</sup> | Gene         | Predicted function                                                                       | Fold-change (CHP/control) |
|---------------------------------|--------------|------------------------------------------------------------------------------------------|---------------------------|
| <b>Electron transport chain</b> |              |                                                                                          |                           |
| CV_0665                         |              | ATP synthase protein I                                                                   | 0.35                      |
| CV_0666                         | <i>atpB</i>  | ATP synthase F0, A subunit; F-type H <sup>+</sup> -transporting ATPase subunit a         | 0.30                      |
| CV_0667                         | <i>atpE</i>  | ATP synthase F0, C subunit; F-type H <sup>+</sup> -transporting ATPase subunit c         | 0.36                      |
| CV_0668                         | <i>atpF</i>  | ATP synthase F0, B subunit; F-type H <sup>+</sup> -transporting ATPase subunit b         | 0.24                      |
| CV_0669                         | <i>atpH</i>  | ATP synthase F1, delta subunit; F-type H <sup>+</sup> -transporting ATPase subunit delta | 0.32                      |
| CV_0670                         | <i>atpA</i>  | ATP synthase F1, alpha subunit; F-type H <sup>+</sup> -transporting ATPase subunit alpha | 0.36                      |
| CV_0671                         | <i>atpG</i>  | F-type H <sup>+</sup> -transporting two-sector ATPase, gamma subunit                     | 0.41                      |
| CV_0672                         | <i>atpD</i>  | F-type H <sup>+</sup> -transporting two-sector ATPase, beta subunit                      | 0.47                      |
| CV_0673                         | <i>atpC</i>  | F-type H <sup>+</sup> -transporting two-sector ATPase, epsilon subunit                   | 0.47                      |
| CV_0944                         | <i>nuoD</i>  | NADH-ubiquinone oxidoreductase, chain D; NADH-quinone oxidoreductase subunit D           | 0.36                      |
| CV_0945                         | <i>nuoE</i>  | NADH-ubiquinone oxidoreductase, chain E; NADH-quinone oxidoreductase subunit E           | 0.30                      |
| CV_0946                         | <i>nuoF</i>  | NADH-ubiquinone oxidoreductase, chain F; NADH-quinone oxidoreductase subunit F           | 0.30                      |
| CV_0947                         | <i>nuoG</i>  | NADH-ubiquinone oxidoreductase, chain G; NADH-quinone oxidoreductase subunit G           | 0.35                      |
| CV_0948                         | <i>nuoH</i>  | NADH-ubiquinone oxidoreductase, chain H; NADH-quinone oxidoreductase subunit H           | 0.37                      |
| CV_0949                         | <i>nuoI</i>  | NADH-ubiquinone oxidoreductase, chain I; NADH-quinone oxidoreductase subunit I           | 0.33                      |
| CV_0950                         | <i>nuoJ</i>  | NADH-ubiquinone oxidoreductase, chain J; NADH-quinone oxidoreductase subunit J           | 0.41                      |
| CV_0951                         | <i>nuoK</i>  | NADH-ubiquinone oxidoreductase, chain K; NADH-quinone oxidoreductase subunit K           | 0.42                      |
| CV_1171                         |              | probable cytochrome-c oxidase, subunit III; cytochrome c oxidase cbb3-type subunit III   | 0.30                      |
| CV_1172                         |              | cytochrome c oxidase cbb3-type subunit IV                                                | 0.26                      |
| CV_1173                         |              | probable cytochrome-c oxidase, subunit II; cytochrome c oxidase cbb3-type subunit II     | 0.21                      |
| CV_1174                         |              | probable cytochrome-c oxidase, subunit I; cytochrome c oxidase cbb3-type subunit I       | 0.24                      |
| CV_3368                         | <i>frdB</i>  | fumarate reductase, subunit B; fumarate reductase iron-sulfur subunit                    | 0.47                      |
| CV_3369                         | <i>frdA</i>  | fumarate reductase flavoprotein subunit                                                  | 0.47                      |
| CV_3370                         | <i>dcuB</i>  | anaerobic C4-dicarboxylate membrane transporter protein                                  | 0.49                      |
| CV_3992                         | <i>cyoE</i>  | farnesyl-diphosphate farnesyltransferase; protoheme IX farnesyltransferase               | 0.26                      |
| CV_3993                         | <i>cyoD</i>  | cytochrome o ubiquinol oxidase subunit IV                                                | 0.32                      |
| CV_3994                         | <i>cyoC</i>  | cytochrome o ubiquinol oxidase, subunit III                                              | 0.22                      |
| CV_3995                         | <i>cyoB</i>  | cytochrome o ubiquinol oxidase, subunit I                                                | 0.21                      |
| CV_3996                         | <i>cyoA</i>  | cytochrome o ubiquinol oxidase, subunit II                                               | 0.26                      |
| CV_4007                         | <i>petB</i>  | ubiquinol-cytochrome c reductase                                                         | 0.50                      |
| CV_4008                         | <i>petA</i>  | ubiquinol-cytochrome c reductase                                                         | 0.49                      |
| <b>Nucleotide biosynthesis</b>  |              |                                                                                          |                           |
| CV_0369                         | <i>pyrB</i>  | aspartate carbamoyltransferase catalytic chain                                           | 0.46                      |
| CV_0370                         | <i>pyrI</i>  | aspartate carbamoyltransferase; aspartate carbamoyltransferase regulatory subunit        | 0.36                      |
| CV_0546                         | <i>purH</i>  | phosphoribosylaminoimidazolecarboxamide formyltransferase / IMP cyclohydrolase           | 0.41                      |
| CV_0547                         | <i>purD</i>  | phosphoribosylamine-glycine ligase                                                       | 0.49                      |
| CV_1812                         | <i>pyrD</i>  | dihydroorotate oxidase                                                                   | 0.40                      |
| CV_2198                         | <i>pyrH</i>  | uridylylase kinase                                                                       | 0.39                      |
| CV_2284                         | <i>nrdB</i>  | ribonucleoside-diphosphate reductase system                                              | 0.46                      |
| CV_2285                         |              | hypothetical protein                                                                     | 0.45                      |
| CV_2286                         |              | hypothetical protein                                                                     | 0.46                      |
| CV_2287                         | <i>nrdA</i>  | ribonucleoside-diphosphate reductase system; alpha chain                                 | 0.39                      |
| CV_2922                         |              | probable GMP reductase                                                                   | 0.23                      |
| CV_3528                         | <i>purA2</i> | adenylosuccinate synthetase                                                              | 0.32                      |
| CV_3834                         | <i>purB</i>  | adenylosuccinate lyase                                                                   | 0.36                      |
| CV_3900                         | <i>hpT</i>   | hypoxanthine phosphoribosyltransferase                                                   | 0.29                      |
| CV_4058                         | <i>prsA</i>  | ribose-phosphate diphosphokinase                                                         | 0.27                      |
| CV_4248                         | <i>pyrE</i>  | orotate phosphoribosyltransferase                                                        | 0.32                      |
| <b>Fatty acids metabolism</b>   |              |                                                                                          |                           |
| CV_2446                         | <i>fabH</i>  | probable 3-oxoacyl-[acyl-carrier-protein] synthase III                                   | 0.41                      |
| CV_3183                         | <i>fadL</i>  | long-chain fatty acid transport protein precursor                                        | 0.35                      |

|                                                        |              |                                                                                               |      |
|--------------------------------------------------------|--------------|-----------------------------------------------------------------------------------------------|------|
| CV_3412                                                | <i>fabF</i>  | 3-oxoacyl-[acyl-carrier-protein] synthase II                                                  | 0.42 |
| CV_4318                                                | <i>luxE</i>  | long-chain-fatty-acid--luciferin-component ligase, Acyl-protein synthase                      | 0.44 |
| CV_4319                                                | <i>luxC</i>  | conserved hypothetical protein (Acyl-CoA reductase, LuxC, domain)                             | 0.27 |
| <b>Signal transduction/Regulatory function</b>         |              |                                                                                               |      |
| CV_0563                                                | <i>phoR</i>  | two-component system, OmpR family, phosphate sensor histidine kinase PhoR                     | 0.39 |
| CV_1029                                                |              | probable transcriptional regulator, GntR family                                               | 0.45 |
| CV_3106                                                |              | probable two-component sensor histidine kinase                                                | 0.34 |
| CV_3107                                                |              | two-component system, OmpR family, response regulator                                         | 0.46 |
| CV_3378                                                | <i>oxyR</i>  | hydrogen peroxide-inducible genes activator; LysR family transcriptional regulator            | 0.44 |
| CV_4220                                                |              | two-component system, NtrC family, response regulator GlrR                                    | 0.46 |
| <b>Transport</b>                                       |              |                                                                                               |      |
| CV_0925                                                | <i>potF2</i> | polyamine ABC transporter system, substrate-binding protein                                   | 0.44 |
| CV_0938                                                | <i>pstS</i>  | ABC transporter phosphate-binding protein                                                     | 0.35 |
| CV_1105                                                | <i>gltS</i>  | sodium/glutamate symport carrier protein; glutamate:Na <sup>+</sup> symporter, ESS family     | 0.40 |
| CV_1151                                                |              | probable murein hydrolase exporter; holin-like protein                                        | 0.42 |
| CV_1278                                                |              | multidrug resistance signal peptide protein; spermidine export protein MdtI                   | 0.34 |
| CV_1279                                                |              | multidrug resistance signal peptide protein; spermidine export protein MdtJ                   | 0.47 |
| CV_2040                                                |              | sodium-dependent nucleoside transporter; concentrative nucleoside transporter                 | 0.47 |
| CV_2348                                                | <i>mglA</i>  | sugar ABC transporter, ATP-binding protein; simple sugar transport system                     | 0.18 |
| CV_2349                                                |              | probable ABC transporter, permease protein; simple sugar transport system                     | 0.21 |
| CV_2350                                                |              | probable sugar ABC transporter, permease protein                                              | 0.27 |
| CV_2380                                                |              | probable sodium-dependent transporter; neurotransmitter:Na <sup>+</sup> symporter, NSS family | 0.38 |
| CV_2704                                                |              | probable ABC transporter, ATP-binding protein; macrolide transport system                     | 0.49 |
| CV_3100                                                | <i>mgtA</i>  | Mg <sup>2+</sup> -importing ATPase                                                            | 0.26 |
| CV_3432                                                |              | probable amino acid permease; basic amino acid/polyamine antiporter, APA family               | 0.40 |
| CV_3478                                                |              | probable manganese transport transmembrane protein                                            | 0.25 |
| CV_3731                                                |              | MFS transporter, CP family, cyanate transporter                                               | 0.44 |
| CV_3783                                                | <i>arcD</i>  | arginine/ornithine antiporter / lysine permease                                               | 0.47 |
| CV_4070                                                |              | ATP-binding cassette, subfamily B, multidrug efflux pump                                      | 0.44 |
| <b>Metabolism of tRNA, rRNA and ribosomal proteins</b> |              |                                                                                               |      |
| CV_0544                                                |              | NifR3; tRNA-dihydrouridine synthase B                                                         | 0.44 |
| CV_1353                                                | <i>pheT</i>  | phenylalanyl-tRNA synthetase beta chain                                                       | 0.46 |
| CV_1373                                                |              | probable oxidoreductase; ribosomal protein S12 methylthiotransferase                          | 0.21 |
| CV_1932                                                |              | probable RNA methyltransferase; 23S rRNA (uracil1939-C5)-methyltransferase                    | 0.49 |
| CV_2410                                                | <i>typA</i>  | GTP-binding protein TypA                                                                      | 0.31 |
| CV_3674                                                | <i>rimM</i>  | 16S rRNA processing protein                                                                   | 0.45 |
| CV_3675                                                | <i>rpsP</i>  | 30S ribosomal protein S16                                                                     | 0.44 |
| CV_3786                                                |              | S-adenosylmethionine-dependent methyltransferase                                              | 0.40 |
| CV_4056                                                | <i>pth</i>   | aminoacyl-tRNA hydrolase                                                                      | 0.32 |
| CV_4057                                                | <i>rplY</i>  | 50S ribosomal protein L25                                                                     | 0.41 |
| <b>Miscellaneous</b>                                   |              |                                                                                               |      |
| CV_0190                                                |              | glyceraldehyde 3-phosphate dehydrogenase                                                      | 0.41 |
| CV_0191                                                | <i>tktA</i>  | transketolase 1                                                                               | 0.43 |
| CV_0224                                                |              | probable carboxycyclohexadienyl dehydratase; cyclohexadienyl dehydratase                      | 0.39 |
| CV_0266                                                |              | probable collagenase; putative protease                                                       | 0.46 |
| CV_1137                                                | <i>adhE</i>  | acetaldehyde dehydrogenase; alcohol dehydrogenase                                             | 0.47 |
| CV_1170                                                |              | probable iron-sulfur 4Fe-4S ferredoxin transmembrane protein                                  | 0.38 |
| CV_1327                                                | <i>upk</i>   | undecaprenol kinase; undecaprenyl-diphosphatase                                               | 0.46 |
| CV_1516                                                | <i>hrpA</i>  | ATP-dependent helicase hrpA; ATP-dependent helicase HrpA                                      | 0.34 |
| CV_1529                                                |              | probable transmembrane protein                                                                | 0.50 |
| CV_1530                                                | <i>pta</i>   | phosphate acetyltransferase                                                                   | 0.42 |
| CV_1531                                                | <i>ackA</i>  | acetate kinase                                                                                | 0.41 |
| CV_1532                                                |              | probable dioxygenase, alpha subunit                                                           | 0.29 |
| CV_1538                                                | <i>putA</i>  | proline dehydrogenase; DNA-binding domain of proline dehydrogenase                            | 0.41 |
| CV_1650                                                | <i>kbl</i>   | glycine C-acetyltransferase                                                                   | 0.45 |
| CV_1660                                                | <i>gloA</i>  | lactoylglutathione lyase                                                                      | 0.42 |
| CV_1917                                                | <i>shlB</i>  | hemolysin activator protein; hemolysin activation/secretion protein                           | 0.35 |
| CV_1925                                                | <i>folD</i>  | methylenetetrahydrofolate dehydrogenase (NADP+)                                               | 0.46 |

|                                                    |              |                                                                                      |      |
|----------------------------------------------------|--------------|--------------------------------------------------------------------------------------|------|
| CV_1955                                            |              | probable protease                                                                    | 0.40 |
| CV_2217                                            |              | probable FAD-dependent dehydrogenases                                                | 0.45 |
| CV_2347                                            |              | probable membrane lipoprotein; basic membrane protein A and related proteins         | 0.22 |
| CV_2449                                            |              | probable coenzyme F390 synthetase                                                    | 0.47 |
| CV_2467                                            |              | probable membrane lipoprotein; basic membrane protein A and related proteins         | 0.25 |
| CV_2503                                            |              | probable Transmembrane protein                                                       | 0.44 |
| CV_2540                                            | <i>narI</i>  | nitrate reductase gamma subunit                                                      | 0.27 |
| CV_2541                                            | <i>narJ</i>  | nitrate reductase delta subunit                                                      | 0.28 |
| CV_2542                                            | <i>narH</i>  | nitrate reductase beta subunit                                                       | 0.28 |
| CV_2543                                            | <i>narG</i>  | respiratory nitrate reductase alpha chain                                            | 0.20 |
| CV_2637                                            | <i>dsbG</i>  | thiol:disulfide interchange protein DsbG                                             | 0.45 |
| CV_2703                                            |              | probable outer membrane protein                                                      | 0.46 |
| CV_2841                                            | <i>rhIE2</i> | ATP-dependent RNA helicase                                                           | 0.41 |
| CV_2853                                            | <i>dbpA</i>  | ATP-dependent RNA helicase dbpA; ATP-independent RNA helicase DbpA                   | 0.41 |
| CV_2876                                            | <i>speA</i>  | arginine decarboxylase                                                               | 0.39 |
| CV_2892                                            | <i>rhIE1</i> | ATP-dependent RNA helicase                                                           | 0.39 |
| CV_2904                                            |              | carboxylate-amine ligase                                                             | 0.43 |
| CV_3193                                            | <i>dsbH</i>  | protein-disulfide reductase; disulfide bond formation protein DsbB                   | 0.37 |
| CV_3209                                            | <i>osmB</i>  | osmotically inducible lipoprotein                                                    | 0.48 |
| CV_3399                                            | <i>bfr</i>   | bacterioferritin                                                                     | 0.27 |
| CV_3476                                            | <i>fumA</i>  | fumarate hydratase                                                                   | 0.47 |
| CV_3529                                            |              | ATP phosphoribosyltransferase regulatory subunit                                     | 0.42 |
| CV_3530                                            | <i>hflC</i>  | membrane protease subunit HflC                                                       | 0.43 |
| CV_3584                                            | <i>hemK</i>  | HemK protein; release factor glutamine methyltransferase                             | 0.50 |
| CV_3639                                            | <i>priB</i>  | primosomal replication protein N                                                     | 0.47 |
| CV_3644                                            | <i>suhB</i>  | myo-inositol-1(or 4)-monophosphatase                                                 | 0.40 |
| CV_3648                                            | <i>hemN</i>  | oxygen-independent coproporphyrinogen III oxidase                                    | 0.30 |
| CV_3791                                            |              | probable FkbP-type peptidyl-prolyl cis-trans isomerase                               | 0.50 |
| CV_3901                                            | <i>galU</i>  | UTP-glucose-1-phosphate uridylyltransferase                                          | 0.36 |
| CV_3926                                            | <i>goaG</i>  | 4-aminobutyrate transaminase                                                         | 0.47 |
| CV_3927                                            | <i>gabD</i>  | succinate-semialdehyde dehydrogenase [NAD(P)]                                        | 0.44 |
| CV_4004                                            | <i>sspB</i>  | stringent starvation protein B                                                       | 0.46 |
| CV_4084                                            |              | probable protease                                                                    | 0.33 |
| <b>Hypothetical/Conserved hypothetical protein</b> |              |                                                                                      |      |
| CV_0223                                            |              | conserved hypothetical protein                                                       | 0.42 |
| CV_0272                                            |              | conserved hypothetical protein (Gly-zipper_Omp domain)                               | 0.37 |
| CV_0929                                            |              | hypothetical protein                                                                 | 0.41 |
| CV_1169                                            |              | conserved hypothetical protein (FixH domain, symbiotic nitrogen fixation)            | 0.42 |
| CV_1661                                            |              | conserved hypothetical protein (Citrate transporter domain)                          | 0.49 |
| CV_1936                                            |              | conserved hypothetical protein (LysE type translocator motif)                        | 0.49 |
| CV_1953                                            |              | hypothetical protein                                                                 | 0.37 |
| CV_1963                                            |              | conserved hypothetical protein (PhoPQ-activated pathogenicity-related protein motif) | 0.36 |
| CV_2047                                            |              | conserved hypothetical protein                                                       | 0.43 |
| CV_2300                                            |              | conserved hypothetical protein (Thioesterase superfamily domain)                     | 0.48 |
| CV_2409                                            |              | hypothetical protein                                                                 | 0.48 |
| CV_2812                                            |              | hypothetical protein                                                                 | 0.40 |
| CV_2851                                            |              | conserved hypothetical protein (FAD binding domain)                                  | 0.45 |
| CV_2890                                            |              | hypothetical protein                                                                 | 0.40 |
| CV_3069                                            |              | conserved hypothetical protein (Cytochrom_C_2 domain)                                | 0.37 |
| CV_3077                                            |              | conserved hypothetical protein ( Homoserine dehydrogenase, NAD binding domain)       | 0.31 |
| CV_3098                                            |              | hypothetical protein                                                                 | 0.36 |
| CV_3099                                            |              | hypothetical protein                                                                 | 0.29 |
| CV_3123                                            |              | conserved hypothetical protein                                                       | 0.43 |
| CV_3147                                            |              | conserved hypothetical protein                                                       | 0.46 |
| CV_3509                                            |              | conserved hypothetical protein (Radical SAM superfamily domain)                      | 0.41 |
| CV_3566                                            |              | hypothetical protein                                                                 | 0.43 |
| CV_3583                                            |              | conserved hypothetical protein (PAP2 superfamily domain)                             | 0.47 |
| CV_3788                                            |              | conserved hypothetical protein                                                       | 0.38 |



|                                        |                                                                          |      |
|----------------------------------------|--------------------------------------------------------------------------|------|
| <b>CV_4054</b>                         | conserved hypothetical protein (Chain length determinant protein domain) | 0.36 |
| <b>CV_4055</b>                         | conserved hypothetical protein (Ferrous iron transport protein B domain) | 0.32 |
| <b>CV_4108</b>                         | conserved hypothetical protein                                           | 0.42 |
| <b>CV_4219</b>                         | hypothetical protein                                                     | 0.42 |
| <b>CV_4249</b>                         | conserved hypothetical protein                                           | 0.43 |
| <b>CV_4304</b>                         | conserved hypothetical protein (YfaZ_precursor domain)                   | 0.48 |
| <b>CV_4320</b>                         | conserved hypothetical protein (AMP-binding enzyme domain)               | 0.33 |
| <b>CV_4321</b>                         | conserved hypothetical protein (Acetyltransferase, GNAT, family domain)  | 0.48 |
| <b>VBIChrVio67196_1489<sup>b</sup></b> | hypothetical protein                                                     | 0.46 |
| <b>VBIChrVio67196_2283<sup>b</sup></b> | hypothetical protein                                                     | 0.29 |
| <b>VBIChrVio67196_3403<sup>b</sup></b> | hypothetical protein                                                     | 0.31 |
| <b>VBIChrVio67196_3489<sup>b</sup></b> | hypothetical protein                                                     | 0.31 |
| <b>VBIChrVio67196_3711<sup>b</sup></b> | hypothetical protein                                                     | 0.44 |
| <b>VBIChrVio67196_4098<sup>b</sup></b> | hypothetical protein                                                     | 0.40 |
| <b>VBIChrVio67196_4105<sup>b</sup></b> | hypothetical protein                                                     | 0.37 |

<sup>a</sup>ORF nomenclature as described from the former *C. violaceum* genome annotation.

<sup>b</sup>New ORFs annotated by PATRIC (Pathosystems Integration Resource Center).

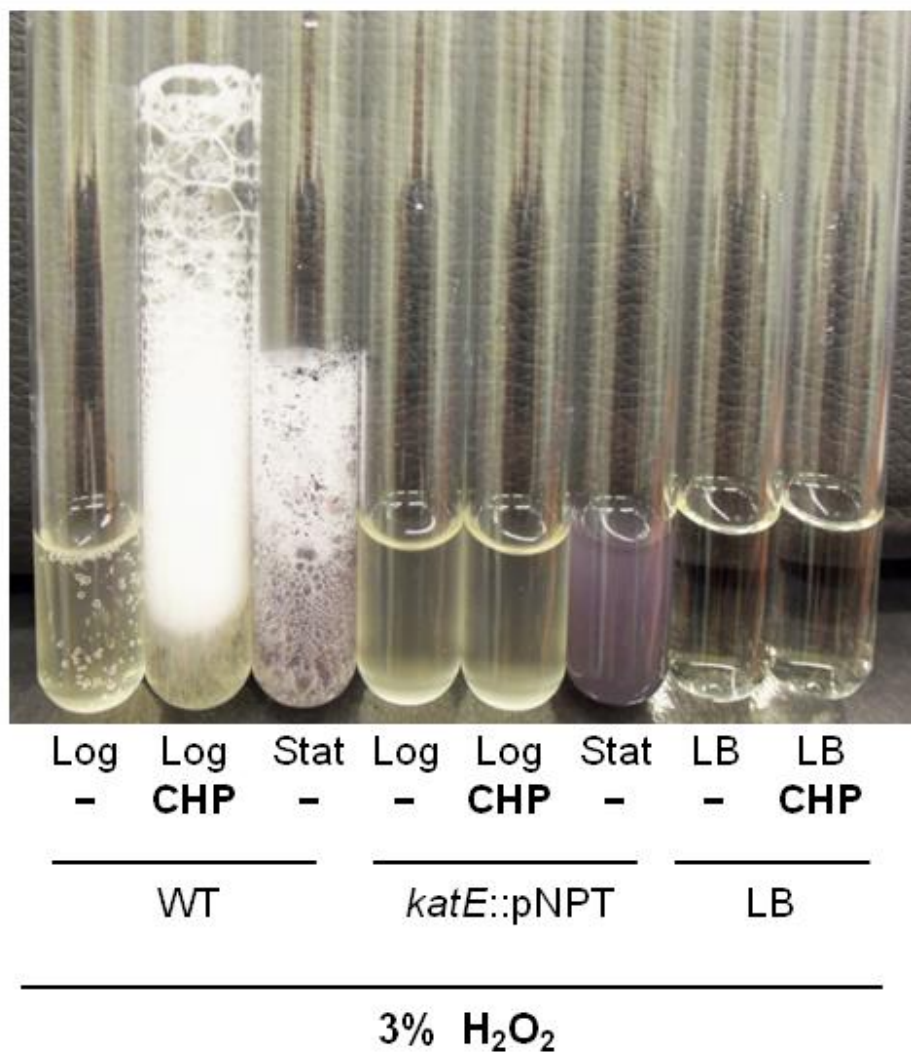

**Figure S1. Effect of CHP in catalase activity.** Catalase tests with *C. violaceum* wild-type and *katE* mutant strain were performed before and 10 minutes after addition of 100  $\mu$ M CHP in cultures of logarithmic phase (Log) or stationary phase (Stat) without CHP. After addition of 3% H<sub>2</sub>O<sub>2</sub> in the cultures, the catalase activity was visualized by immediate production of oxygen bubbles. LB medium and LB with 100  $\mu$ M CHP were used as controls.

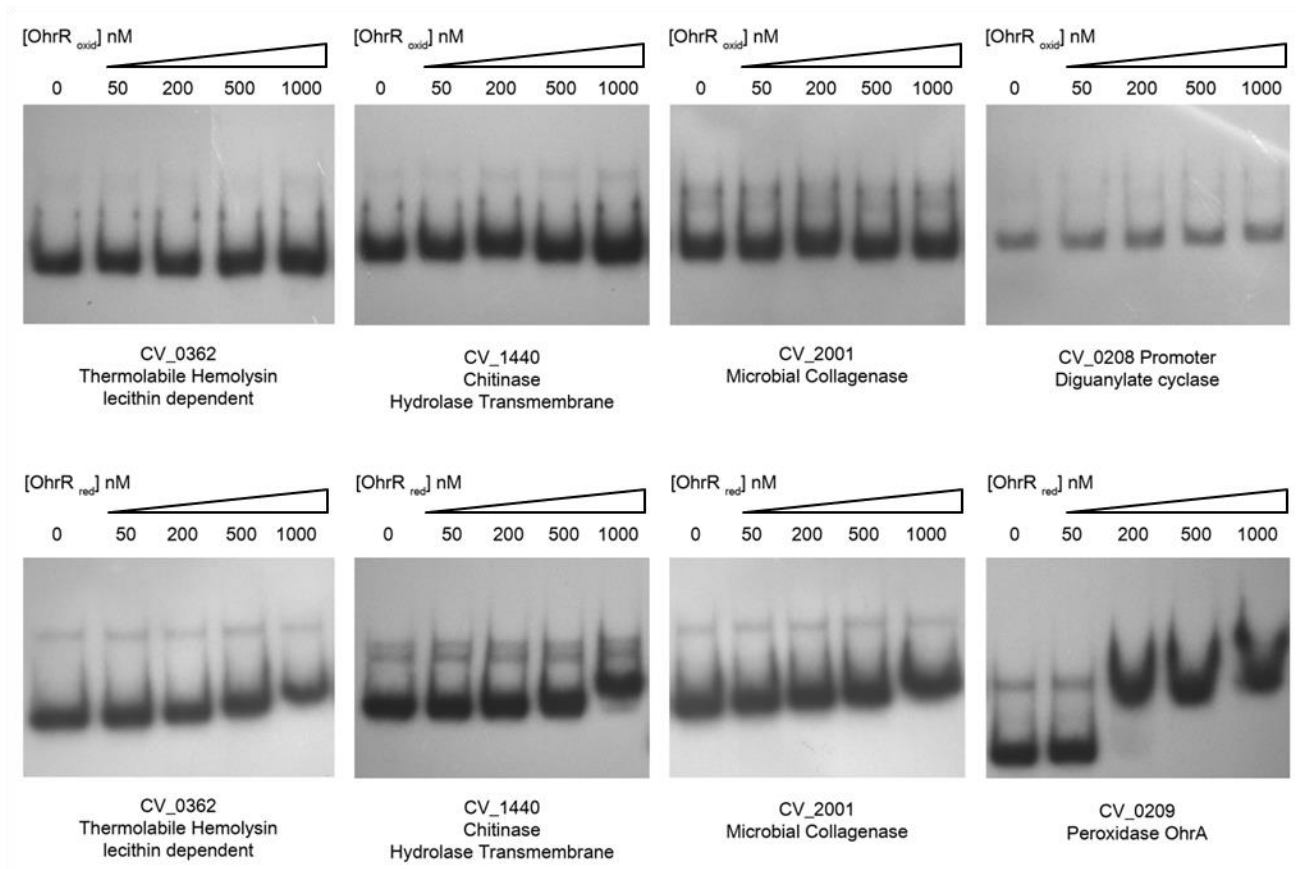

**Figure S2. OhrR interaction with promoter region of genes belonging to the OhrR regulon.** DNA probes corresponding to promoter region of the indicated genes were incubated with various concentrations of the purified OhrR protein previously oxidized (100  $\mu$ M CHP for 1 h) or reduced (10 mM DTT for 1 h). After incubation at 25  $^{\circ}$ C for 25 minutes, the samples were separated on polyacrylamide non-denaturing gel. As a positive control was used the promoter region of *ohrA* (CV\_0209). OhrR bound only to the promoter of *ohrA*.

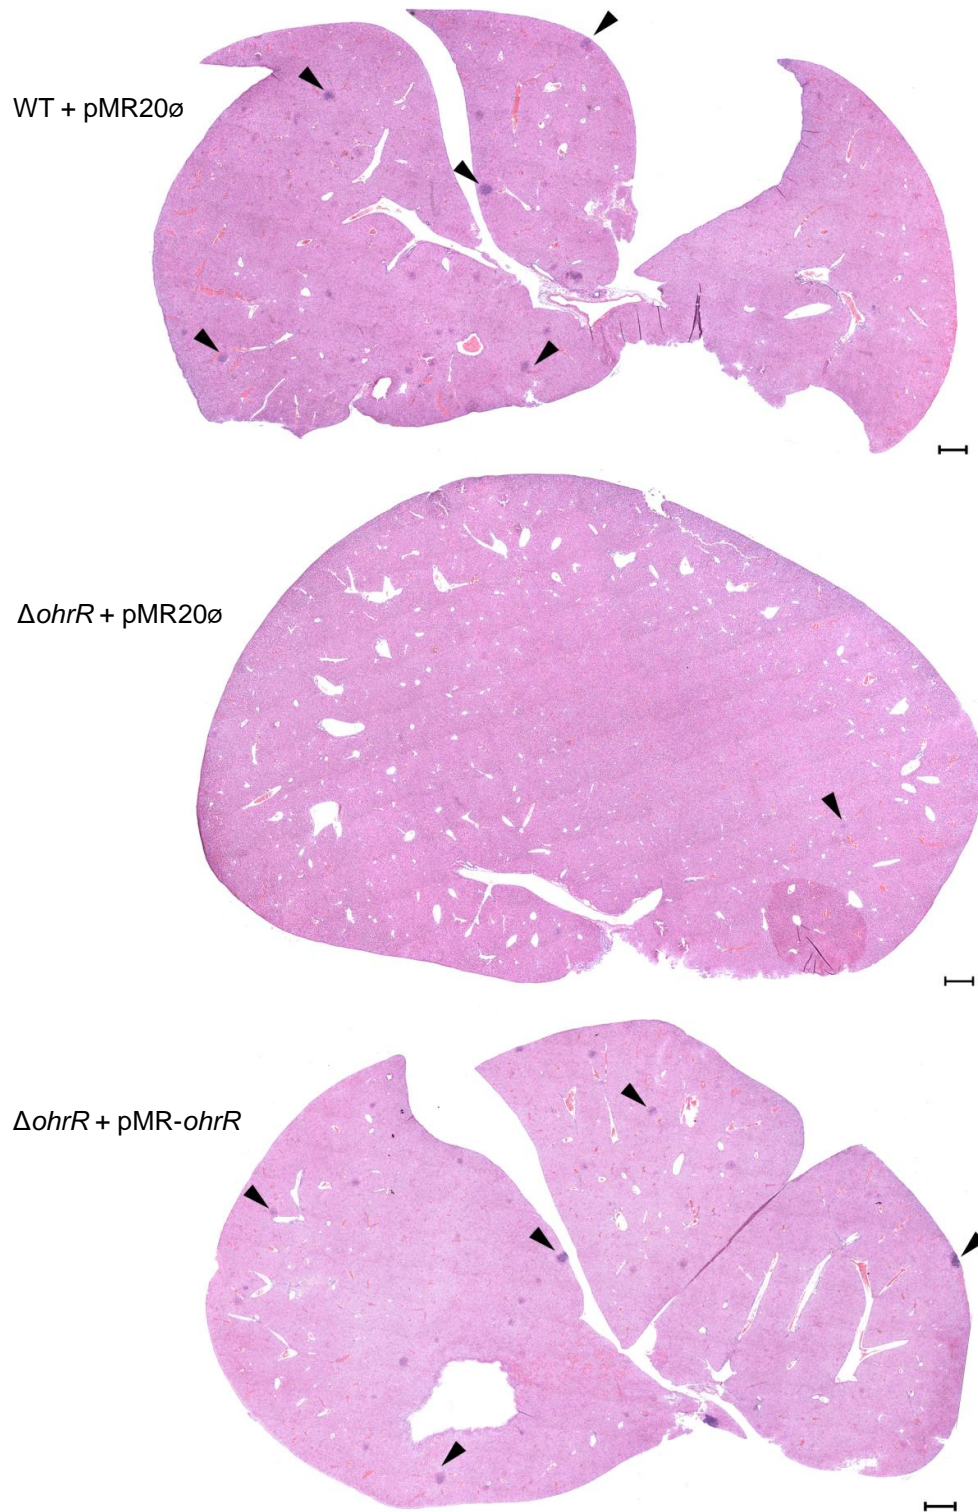

**Figure S3. Histopathological analysis in livers of mice infected with *C. violaceum*.** BALBc mice were infected with the indicated *C. violaceum* strains and the liver samples were stained with hematoxylin and eosin. The multiple microscopic lesion foci, indicated by arrows, were counted for each strain: 20 for wild type; 5 for  $\Delta$ ohrR mutant; 23 for complement strain. Bar, 500  $\mu$ m.
